# Supplementary material for: Remarkable static and dynamic NLO response of alkali and superalkali doped macrocyclic [hexa-]thiophene complexes; a DFT approach
Source: PubMed Central journal article supplement (PMC8694385; doi:10.1039/d0ra08099c), 2021-01-20
Supplement: RA-011-D0RA08099C-s001.pdf [file RA-011-D0RA08099C-s001.pdf]

**Remarkable static and dynamic NLO response of alkalis and superalkalis doped  
macrocyclic [hexa-]thiophene complexes; a DFT approach**

Hasnain Sajid, Faizan Ullah, Sidra Khan, Khurshid Ayub, Tariq Mahmood\*

Department of Chemistry, COMSATS University Islamabad, Abbottabad Campus,  
Abbottabad-22060, Pakistan

\*To whom correspondence can be addressed: E-mail: [mahmood@cuiatd.edu.pk](mailto:mahmood@cuiatd.edu.pk) (T. M)

---

Li@6CT

---

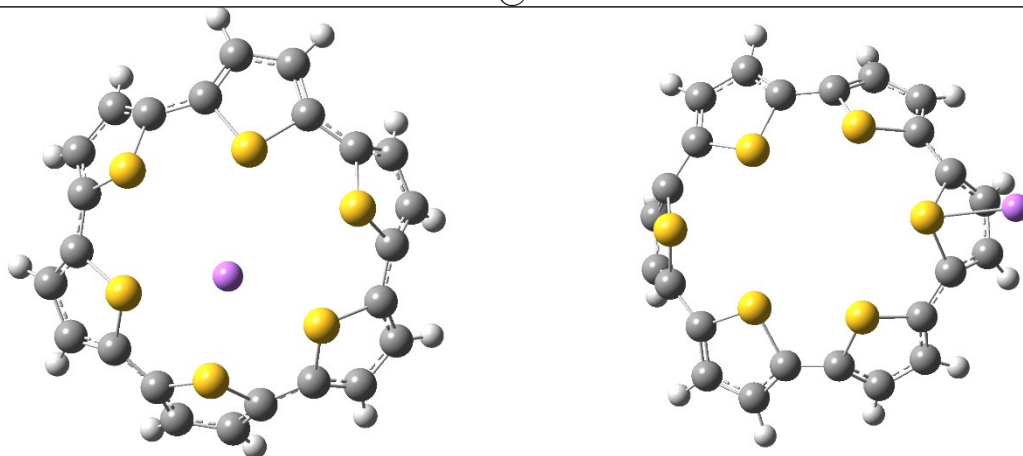

---

Na@6CT

---

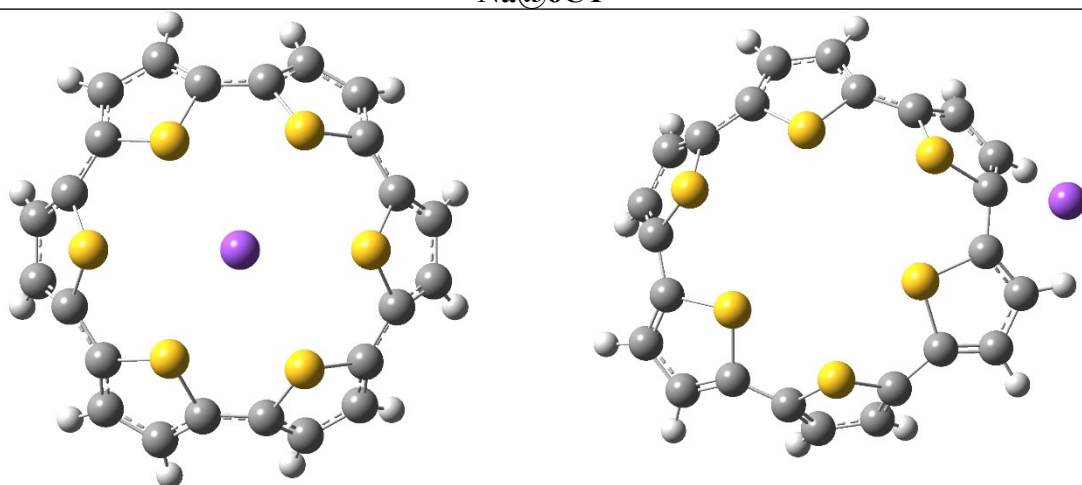

---

K@6CT

---

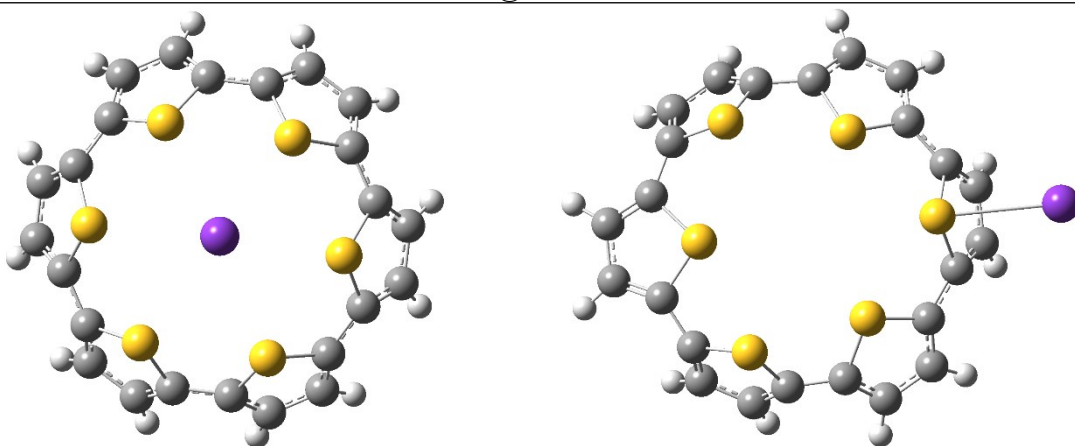

---

**Figure. S1.** The possible optimized geometries of AA@6CT complexes.

---

$\text{Li}_3\text{O}@6\text{CT}$

---

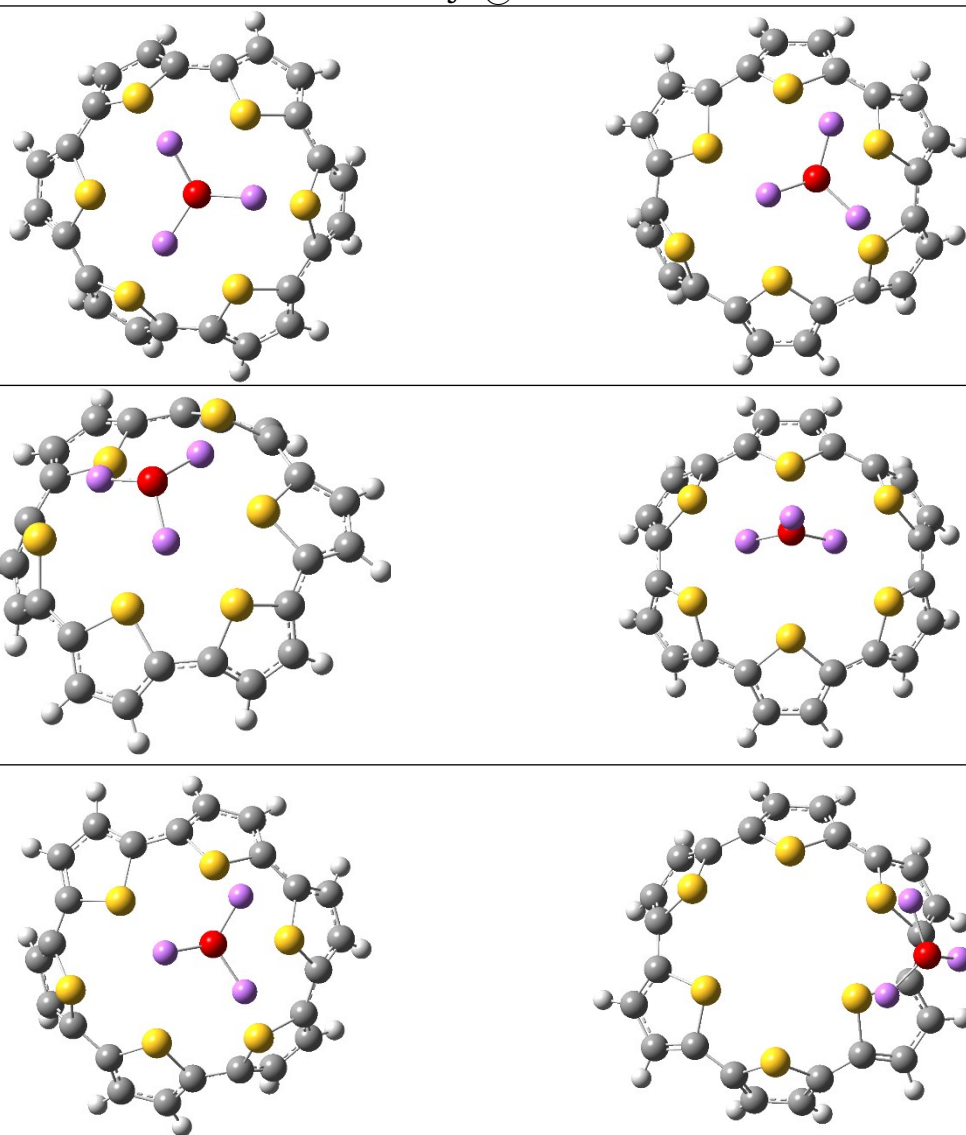

**Figure. S2.** The possible optimized geometries of  $\text{Li}_3\text{O}@6\text{CT}$  complexes.

---

$\text{Na}_3\text{O}@6\text{CT}$

---

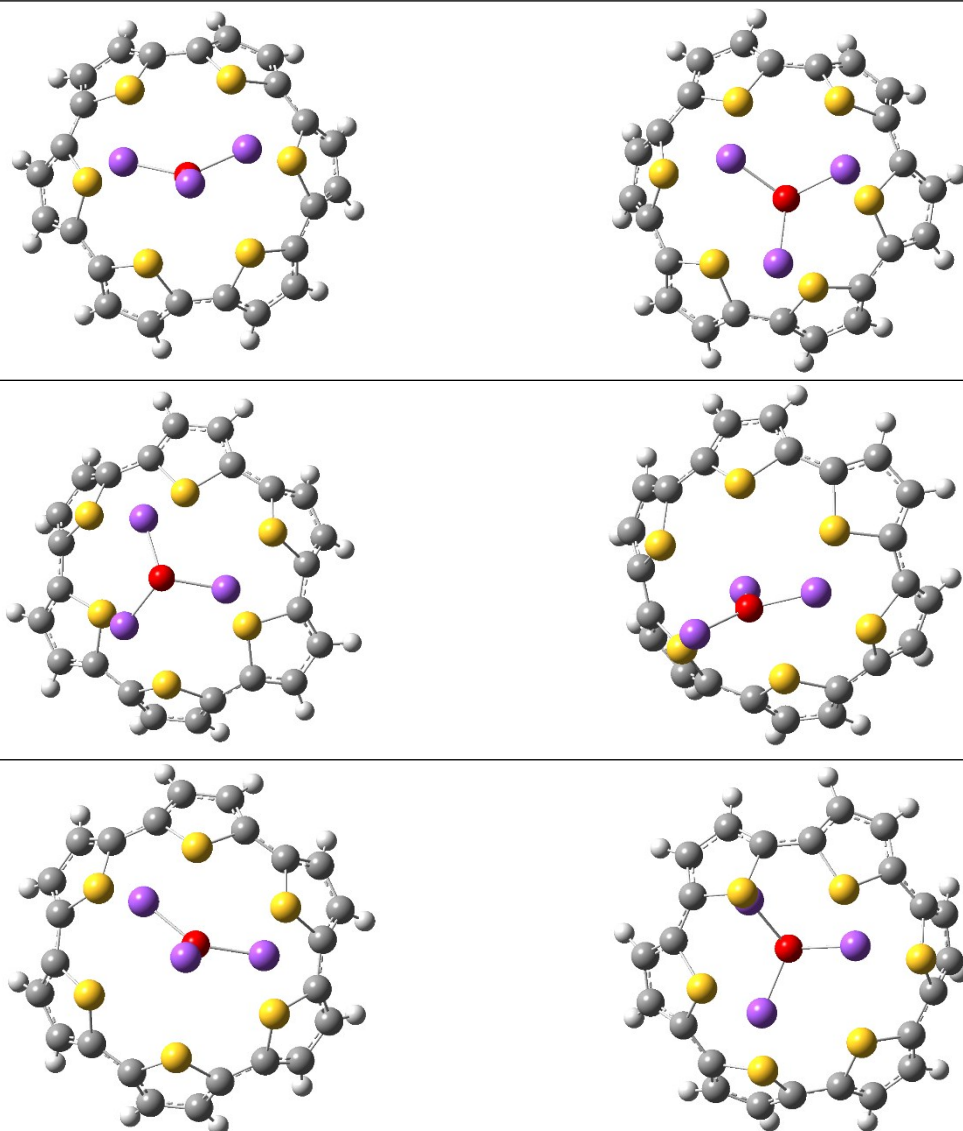

**Figure. S3.** The possible optimized geometries of  $\text{Na}_3\text{O}@6\text{CT}$  complexes.

---

$K_3O@6CT$

---

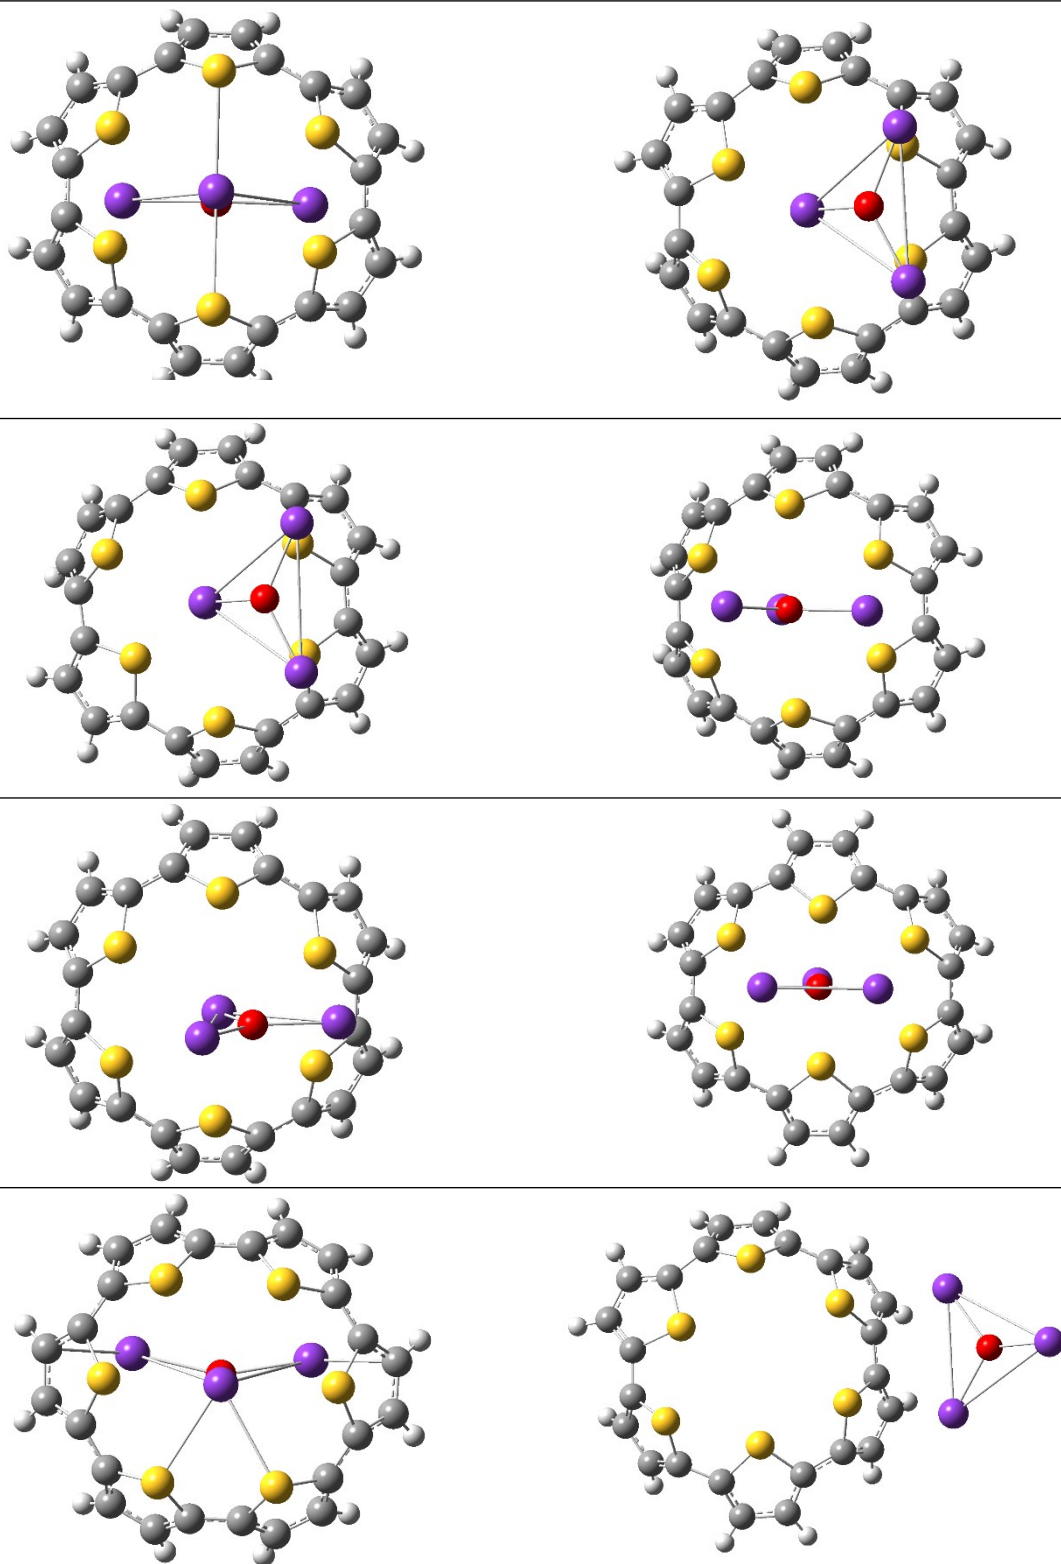

**Figure. S2.** The possible optimized geometries of  $K_3O@6CT$  complexes.
